# Supplementary material for: Optimization of an Untargeted DART-HRMS Method Envisaging Identification of Potential Markers for Saffron Authenticity Assessment
Source: MDPI journal article supplement (doi:10.3390/foods10061238), 2021-05-29
Supplement: s1 [file s1]

Figure 2 Supplementary. Hierarchical Cluster Analysis (HCA) of compounds list of pure saffron (A) and adulterated samples (B) obtained after filtration of the software output by p-value  $\leq 0.01$  in every ratio of the ANOVA test. In particular, the dendrograms clusterizing the different samples along with the distances calculated for the main nodes were reported.

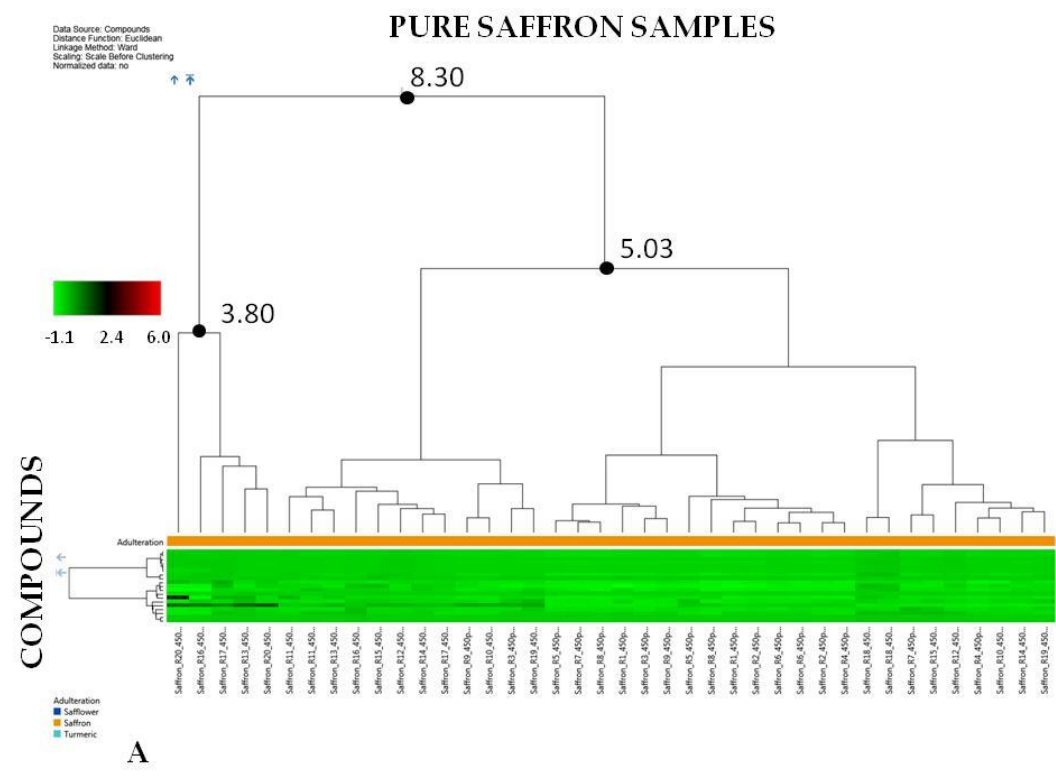

Data Source: Compounds  
Distance Function: Euclidean  
Linkage Method: Ward  
Scaling: Scale Before Clustering  
Normalized data: no

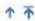

ADULTERATED SAFFRON

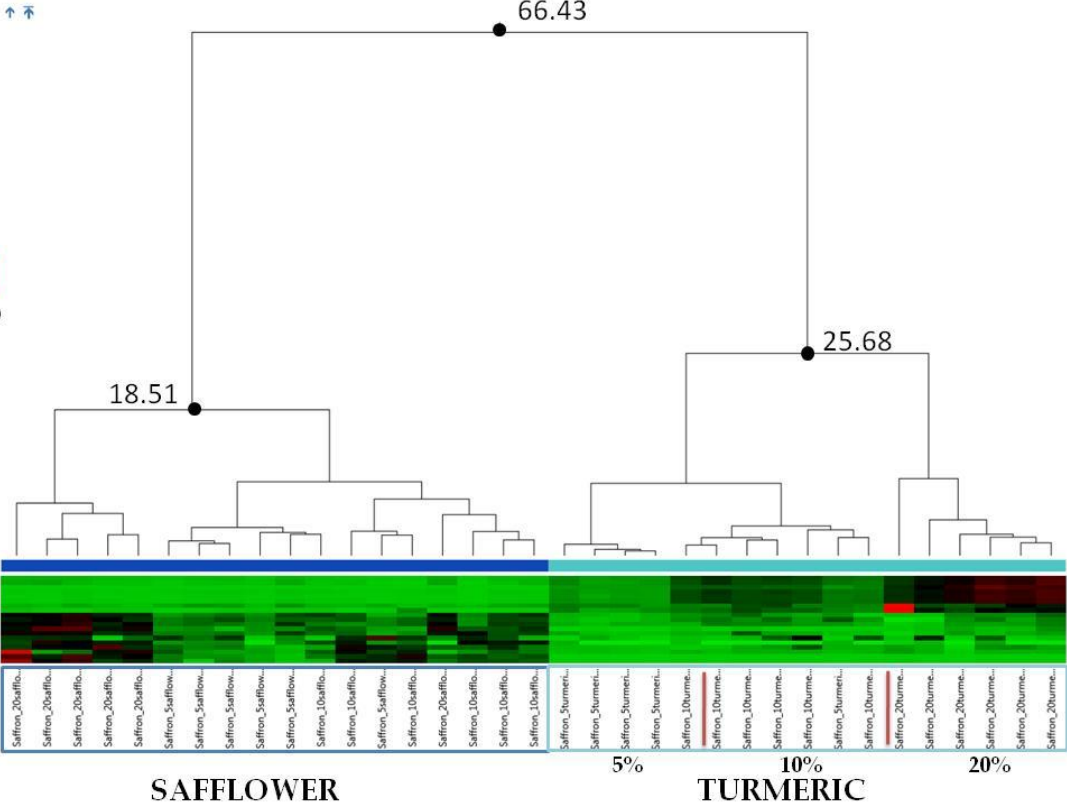

B
